# Supplementary material for: Synthesis of Multiple Emission Carbon Dots from Dihydroxybenzoic Acid via Decarboxylation Process
Source: MDPI journal article supplement (doi:10.3390/nano13142062), 2023-07-13
Supplement: s1 [file s1]

Supplementary materials

# **Synthesis of Multiple Emission Carbon Dots from Dihydroxybenzoic Acid via Decarboxylation Process**

Pengfei Li, Jijian Xu, Ziyue Shen, Wenning Liu, Li An, Dan Qu, Xiayan Wang and Zaicheng Sun\*

Center of Excellence for Environmental Safety and Biological Effects, Beijing Key Laboratory for Green Catalysis and Separation, Department of Chemistry, Beijing University of Technology, Beijing 100124, People's Republic of China.

Email: [sunzc@bjut.edu.cn](mailto:sunzc@bjut.edu.cn)

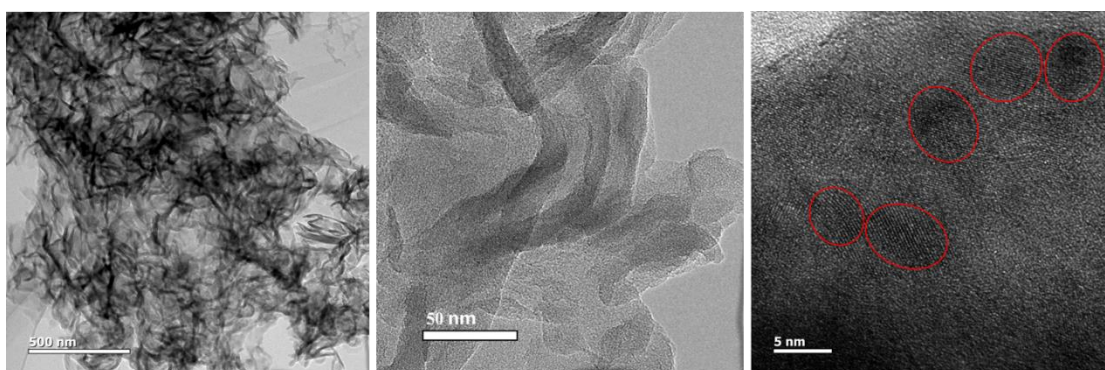

**Figure S1.** Representative TEM image of CDs@C<sub>3</sub>N<sub>4</sub> composite photocatalyst under the different scales.

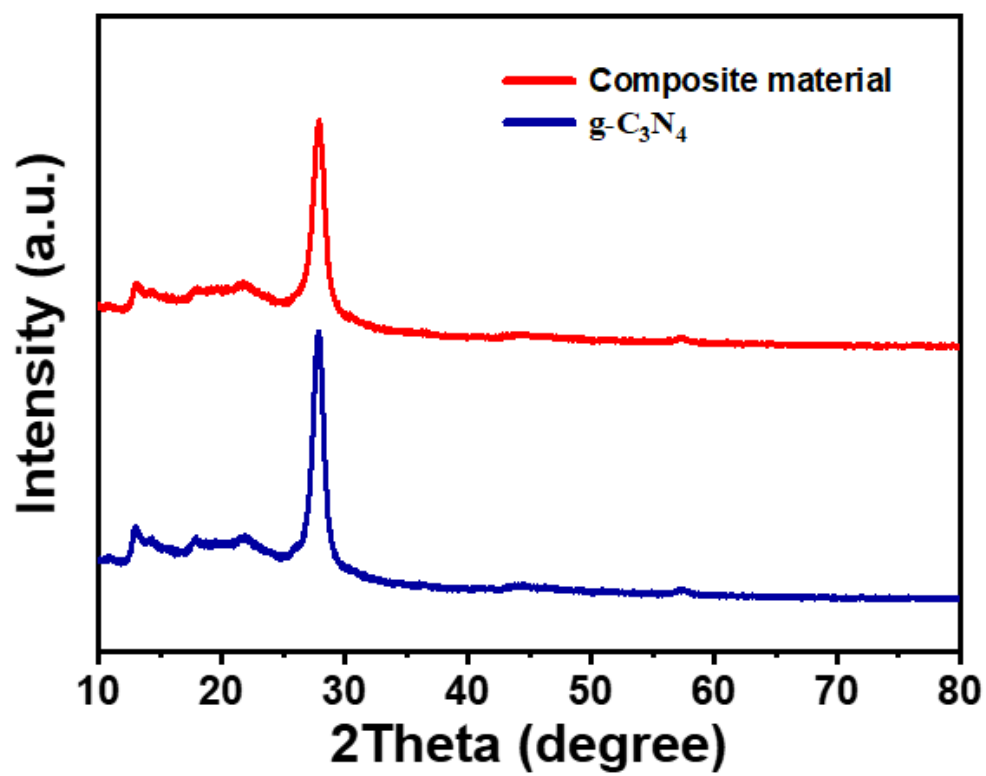

**Figure S2.** XRD pattern of pure C<sub>3</sub>N<sub>4</sub> and CDs@C<sub>3</sub>N<sub>4</sub> composite material.

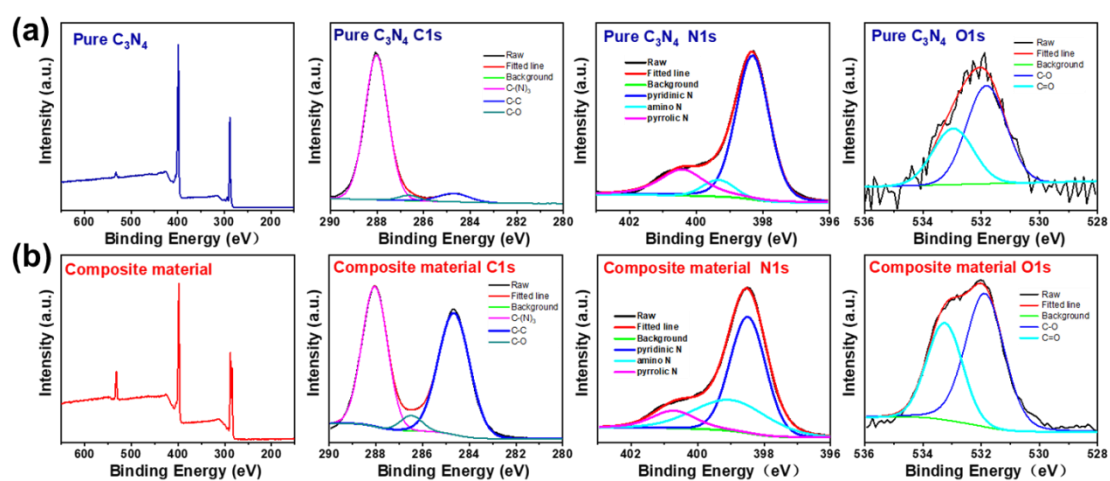

**Figure S3.** XPS survey spectrum of the (a) pure  $C_3N_4$ , and (b) composite material

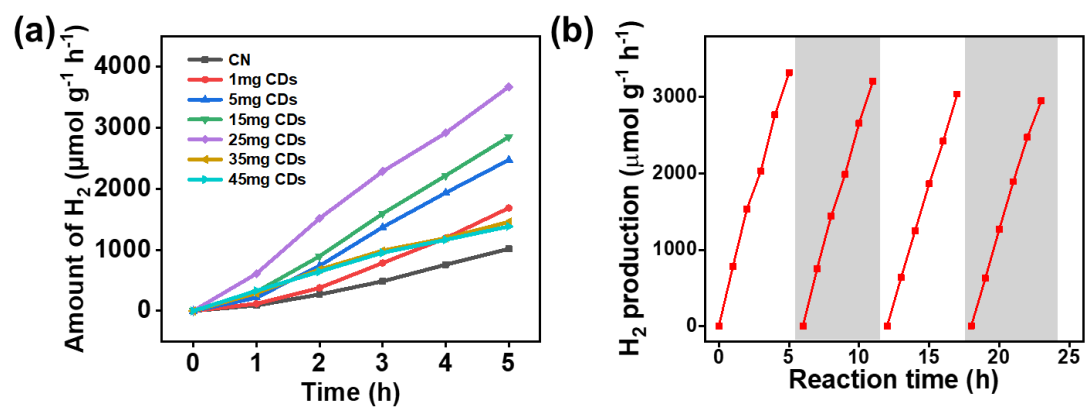

**Figure S4. (a)** Photocatalytic H<sub>2</sub> production of 2,4-CN with different content CDs, loading 1.0 wt% Pt in the 10 vol% triethanolamine (TEOA) under light irradiation ( $\lambda > 420$  nm). **(b)** the stability experiment of the best composite material

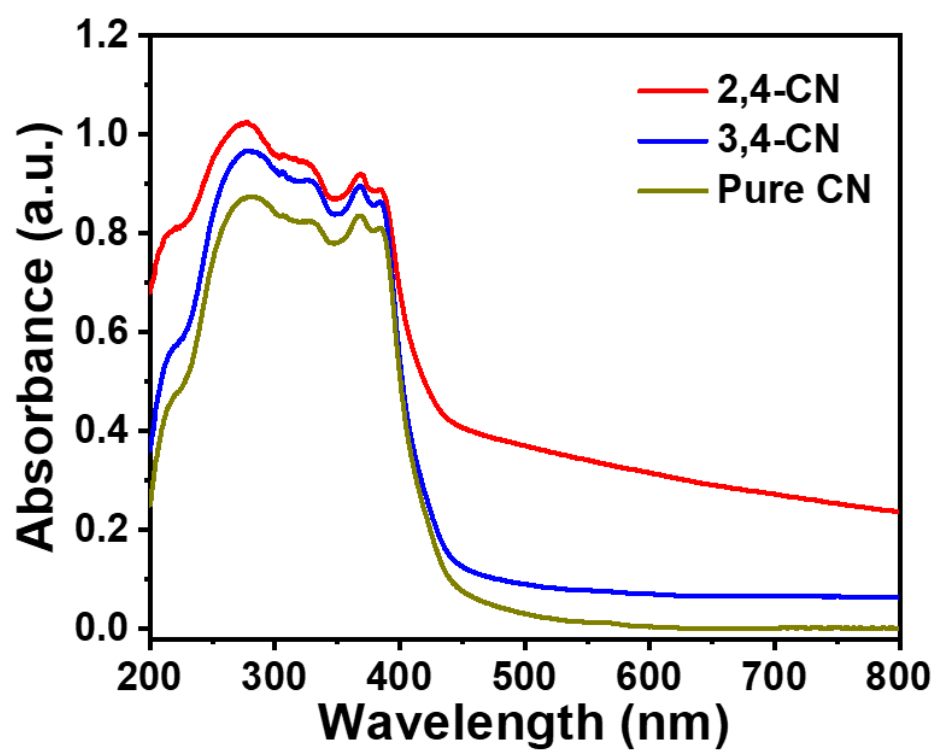

**Figure S5.** DRS UV-vis spectra of pure CN, 2,4- and 3,4-CN.

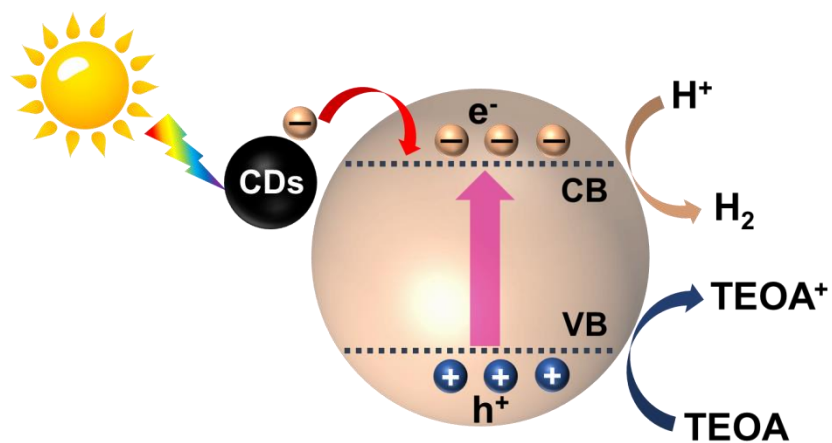

Figure S6. The schematic diagram of the composite photocatalytic hydrogen generation mechanism

Table S1. The photocatalysis hydrogen production efficiency comparative table of CDs composition

| Composite<br>/heterojunction                                       | Method of<br>synthesis           | Hydrogen production<br>efficiency                                                                         | Light source                              | References |
|--------------------------------------------------------------------|----------------------------------|-----------------------------------------------------------------------------------------------------------|-------------------------------------------|------------|
| CNNS/CQDs                                                          | Solvothermal<br>method           | 116.1 $\mu\text{mol h}^{-1}$ , 3 times<br>higher than pure CNN                                            | 300 W Xe arc lamp                         | [1]        |
| g-C <sub>3</sub> N <sub>4</sub> /TiO <sub>2</sub> /<br>CQDs/Au     | Solvothermal<br>method           | 5.69 mmol g <sup>-1</sup> h <sup>-1</sup> , 6.2 times<br>higher than pure g-C <sub>3</sub> N <sub>4</sub> | 500 W Xe lamp                             | [2]        |
| ZnO/C <sub>3</sub> N <sub>4</sub> QDs                              | Dip-coating<br>method            | 2.29 times higher than pure<br>ZnO                                                                        |                                           | [3]        |
| OH-CQDs/CNF-X                                                      | Solvothermal<br>approach         | 357.98 $\mu\text{mol g}^{-1}$                                                                             | 300 W Xe lamp                             | [4]        |
| CQD/CdS                                                            | hydrothermal and<br>stirring     | ~309 mmol g <sup>-1</sup> h <sup>-1</sup>                                                                 | visible light                             | [5]        |
| CD-C <sub>3</sub> N <sub>4</sub><br>composite                      | electrochemical<br>hydrothermal  | ~8.4 mmol h <sup>-1</sup>                                                                                 | 300 W Xe lamp                             | [6]        |
| CQD/HCN<br>Nanocomposites                                          | furnace (500 °C)                 | 382 $\mu\text{mol g}^{-1}$ h <sup>-1</sup>                                                                | 500 W xenon arc<br>lamp                   | [7]        |
| S, N-CD/g-C <sub>3</sub> N <sub>4</sub><br>composite               | Hydrothermal<br>Solvothermal     | 832 $\mu\text{mol g}^{-1}$ h <sup>-1</sup>                                                                | 300 W Xe lamp                             | [8]        |
| CQDs/2D<br>g-C <sub>3</sub> N <sub>4</sub>                         | Hydrothermal                     | 183 $\mu\text{mol h}^{-1}$ ;<br>48.1 $\mu\text{mol h}^{-1}$                                               | UV: 365 nm;<br>Vis: 420 nm 3 W            | [9]        |
| CQDs/2D<br>TiO <sub>2</sub>                                        | Hydrothermal                     | 79.3 $\mu\text{mol g}^{-1}$ h <sup>-1</sup>                                                               | 500 W Hg lamp,<br>$\lambda$ not specified | [10]       |
| CQDs/2D<br>g-C <sub>3</sub> N <sub>4</sub> /2D<br>TiO <sub>2</sub> | Oven drying                      | 6.497 $\mu\text{mol g}^{-1}$ h <sup>-1</sup>                                                              | Vis: >400, 300 W<br>Xe lamp               | [11]       |
| 2,4-CDs@C <sub>3</sub> N <sub>4</sub>                              | homogeneous<br>thermal pyrolysis | 733.8 $\mu\text{mol g}^{-1}$ h <sup>-1</sup> , 3.6 times<br>higher than pure CN                           | 300 W Xe lamp                             | Our work   |

## References

1. Sun, C.; Xu, Q.; Xie, Y.; Ling, Y.; Jiao, J.; Zhu, H.; Zhao, J.; Liu, X.; Hu, B. Zhou, D. High-efficient One-pot Synthesis of Carbon Quantum Dots Decorating Bi<sub>2</sub>MoO<sub>6</sub> Nanosheets Heterostructure with Enhanced Visible-light Photocatalytic Properties. J. Alloy. Compd. 2017, 723, 333-344.
2. Tian, J.; Leng, Y.; Zhao, Z.; Xia, Y.; Sang, Y.; Hao, P.; Zhan, J.; Li, M. Liu, H. Carbon Quantum dots/hydrogenated TiO<sub>2</sub> Nanobelt Heterostructures and Their Broad Spectrum Photocatalytic Properties under UV, Visible, and Near-infrared Irradiation. Nano Energy 2015, 11, 419-427.
3. Zhang, Z.; Zheng, T.; Xu, J.; Zeng, H. Zhang, N. Carbon Quantum Dots/Bi<sub>2</sub>WO<sub>6</sub> Composites for Efficient Photocatalytic Pollutant Degradation and Hydrogen Evolution. Nano 2017, 12, 1750082.
4. Li, S.; Hu, S.; Jiang, W.; Liu, Y.; Zhou, Y.; Liu, J. Wang, Z. Facile Synthesis of Cerium Oxide Nanoparticles Decorated Flower-like Bismuth Molybdate for Enhanced Photocatalytic Activity toward Organic Pollutant



Degradation. *J. Colloid. Interf. Sci.* 2018, 530, 171-178.

5. Gogoi, D.; Koyani, R.; Golder, A.K. Peela, N.R. Enhanced Photocatalytic Hydrogen Evolution using Green Carbon Quantum Dots Modified 1-D CdS Nanowires under Visible Light Irradiation. *Sol. Energy* 2020, 208, 966-977.
6. Liu, J.; Liu, Y.; Liu, N.; Han, Y.; Zhang, X.; Huang, H.; Lifshitz, Y.; Lee, S.-T.; Zhong, J. Kang, Z. Metal-free Efficient Photocatalyst for Stable Visible Water Splitting via a Two-electron Pathway. *Science* 2015, 347, 970-974.
7. Li, L.; Zhu, X. Enhanced Photocatalytic Hydrogen Evolution of Carbon Quantum Dot Modified 1D Protonated Nanorods of Graphitic Carbon Nitride. *ACS Appl. Nano Mater.* 2018, 1, 5337-5344.
8. Xie, Z.; Yu, S.; Fan, X.-B.; Wei, S.; Yu, L.; Zhong, Y.; Gao, X.-W.; Wu, F. Zhou, Y. Wavelength-sensitive Photocatalytic H<sub>2</sub> Evolution from H<sub>2</sub>S Splitting over g-C<sub>3</sub>N<sub>4</sub> with S,N-codoped Carbon Dots as The Photosensitizer. *J. Energy Chem.* 2021, 52, 234-242.
9. Naseri, A.; Samadi, M.; Pourjavadi, A.; Moshfegh, A.Z. Ramakrishna, S. Graphitic Carbon Nitride (g-C<sub>3</sub>N<sub>4</sub>)-based Photocatalysts for Solar Hydrogen Generation: Recent Advances and Future Development Directions. *J. Mater. Chem. A* 2017, 5, 23406-23433.
10. Wang, Q.; Yang, Z. Industrial Water Pollution, Water Environment Treatment, and Health Risks in China. *Environ. Pollut.* 2016, 218, 358-365.
11. Ajmal, A.; Majeed, I.; Malik, R.N.; Idriss, H. Nadeem, M.A. Principles and Mechanisms of Photocatalytic Dye Degradation on TiO<sub>2</sub> Based Photocatalysts: a Comparative Overview. *RSC Adv.* 2014, 4, 37003-37026.
